# Supplementary material for: Prospective, Multicenter Phase II Trial of Non-Pegylated Liposomal Doxorubicin Combined with Ifosfamide in First-Line Treatment of Advanced/Metastatic Soft Tissue Sarcomas
Source: MDPI journal article supplement (doi:10.3390/cancers15205036), 2023-10-18
Supplement: s1 [file s1]

Table S1: Grade 3-4 adverse events (43 patients).

| Level | Neutropenia | Febrile<br>Neutropenia | Thrombocytopenia | Anaemia | Asthenia | Nausea-Emesis | Constipation | Liver | kidney |
|-------|-------------|------------------------|------------------|---------|----------|---------------|--------------|-------|--------|
| 0     | 2           | N                      | 0                | 1       | 1        | 1             | 0            | 2     | 2      |
| 0     | 3           | N                      | 1                | 2       | 1        | 1             | 0            | 1     | 0      |
| 0     | 4           | N                      | 0                | 1       | 1        | 1             | 1            | 0     | 0      |
| 0     | 0           | N                      | 1                | 2       | 1        | 2             | 1            | 0     | 0      |
| 0     | 0           | N                      | 0                | 1       | 1        | 1             | 1            | 0     | 0      |
| 0     | 4           | N                      | 2                | 2       | 2        | 2             | 1            | 0     | 0      |
| 0     | 0           | N                      | 0                | 1       | 1        | 1             | 1            | 0     | 0      |
| 0     | 2           | N                      | 0                | 1       | 1        | 1             | 1            | 0     | 0      |
| 0     | 2           | N                      | 2                | 2       | 2        | 2             | 0            | 0     | 0      |
| 0     | 4           | Y                      | 0                | 1       | 1        | 2             | 1            | 0     | 0      |
| 0     | 4           | N                      | 2                | 2       | 1        | 2             | 1            | 2     | 0      |
| 0     | 4           | N                      | 0                | 2       | 2        | 1             | 0            | 0     | 0      |
| 0     | 4           | N                      | 0                | 2       | 3        | 0             | 2            | 0     | 0      |
| 0     | 4           | N                      | 1                | 1       | 3        | 1             | 0            | 0     | 0      |
| 0     | 0           | N                      | 0                | 0       | 1        | 1             | 2            | 0     | 0      |
| 0     | 0           | N                      | 0                | 0       | 2        | 2             | 1            | 0     | 0      |
| 0     | 3           | N                      | 0                | 2       | 1        | 1             | 1            | 0     | 0      |
| 0     | 4           | N                      | 3                | 1       | 2        | 1             | 0            | 0     | 0      |
| 0     | 3           | N                      | 0                | 1       | 1        | 0             | 1            | 0     | 0      |
| 0     | 4           | N                      | 4                | 3       | 3        | 2             | 2            | 0     | 0      |
| 0     | 4           | N                      | 0                | 0       | 1        | 0             | 0            | 0     | 0      |
| 0     | 4           | Y                      | 4                | 2       | 1        | 2             | 1            | 0     | 0      |
| 0     | 3           | N                      | 1                | 0       | 1        | 2             | 1            | 0     | 0      |
| 0     | 2           | N                      | 0                | 2       | 1        | 1             | 1            | 0     | 0      |
| 0     | 4           | N                      | 0                | 2       | 1        | 2             | 0            | 0     | 0      |
| 0     | 0           | N                      | 0                | 0       | 0        | 1             | 0            | 0     | 0      |
| 0     | 1           | N                      | 0                | 2       | 1        | 1             | 1            | 0     | 0      |
| 0     | 4           | N                      | 2                | 2       | 2        | 1             | 1            | 0     | 0      |
| 0     | 3           | N                      | 2                | 1       | 1        | 0             | 1            | 1     | 0      |
| 0     | 4           | N                      | 4                | 2       | 2        | 1             | 1            | 0     | 0      |
| 0     | 4           | Y                      | 4                | 3       | 2        | 0             | 0            | 0     | 0      |
| 0     | 0           | N                      | 0                | 1       | 1        | 1             | 0            | 0     | 0      |
| 0     | 4           | N                      | 2                | 2       | 3        | 1             | 0            | 0     | 0      |
| 0     | 4           | Y                      | 1                | 2       | 1        | 1             | 0            | 0     | 0      |
| 0     | 0           | N                      | 1                | 0       | 0        | 1             | 0            | 0     | 0      |
| 0     | 4           | N                      | 2                | 2       | 0        | 1             | 0            | 0     | 0      |
| 0     | 2           | N                      | 2                | 3       | 0        | 1             | 0            | 3     | 0      |
| 0     | 2           | N                      | 0                | 2       | 2        | 2             | 1            | 1     | 0      |
| 0     | 3           | N                      | 2                | 1       | 0        | 2             | 0            | 0     | 0      |
| 0     | 4           | N                      | 1                | 3       | 2        | 1             | 0            | 0     | 0      |
| 0     | 4           | Y                      | 1                | 2       | 3        | 1             | 0            | 1     | 0      |
| 0     | 4           | N                      | 0                | 1       | 2        | 1             | 0            | 1     | 0      |
| 0     | 0           | N                      | 0                | 3       | 0        | 0             | 0            | 0     | 0      |

The table displays data on Grade 3-4 toxicities in 43 patients who do not require dose reduction. Level 0: the patients do not receive dose reduction; Y = toxicity present; N= toxicity not present; Two patients who received only one cycle of therapy were not included in this analysis.

Table S2: Grade 3-4 adverse events (35 patients).

| Level | Neutropenia | Febrile<br>Neutropenia | Thrombocytopenia | Anaemia | Asthenia | Nausea-Emesis | Constipation | Liver | kidney |
|-------|-------------|------------------------|------------------|---------|----------|---------------|--------------|-------|--------|
| 1     | 4           | Y                      | 4                | 3       | 2        | 1             | 2            | 0     | 1      |
| 1     | 4           | N                      | 0                | 3       | 0        | 1             | 2            | 0     | 0      |
| 1     | 4           | N                      | 4                | 3       | 0        | 1             | 1            | 0     | 0      |
| 1     | 4           | N                      | 0                | 3       | 1        | 1             | 0            | 0     | 0      |
| 1     | 3           | N                      | 1                | 2       | 2        | 1             | 0            | 0     | 0      |
| 1     | 4           | N                      | 0                | 3       | 2        | 2             | 0            | 0     | 0      |
| 1     | 4           | N                      | 1                | 3       | 1        | 1             | 1            | 0     | 0      |
| 1     | 4           | Y                      | 3                | 3       | 2        | 1             | 1            | 0     | 0      |
| 1     | 4           | Y                      | 1                | 2       | 3        | 3             | 2            | 0     | 0      |
| 1     | 4           | N                      | 4                | 3       | 2        | 0             | 1            | 0     | 0      |
| 1     | 4           | N                      | 2                | 3       | 3        | 2             | 2            | 0     | 2      |
| 1     | 3           | N                      | 0                | 1       | 1        | 0             | 0            | 0     | 0      |
| 1     | 4           | Y                      | 3                | 3       | 3        | 3             | 1            | 0     | 3      |
| 1     | 3           | N                      | 4                | 2       | 1        | 1             | 0            | 0     | 0      |
| 1     | 4           | N                      | 3                | 2       | 2        | 2             | 2            | 0     | 2      |
| 1     | 4           | Y                      | 4                | 2       | 1        | 2             | 2            | 0     | 0      |
| 1     | 4           | N                      | 3                | 2       | 2        | 1             | 0            | 0     | 0      |
| 1     | 4           | Y                      | 3                | 2       | 2        | 1             | 1            | 0     | 0      |
| 1     | 3           | N                      | 4                | 3       | 2        | 1             | 1            | 0     | 0      |
| 1     | 1           | N                      | 2                | 2       | 2        | 3             | 1            | 0     | 0      |
| 1     | 4           | N                      | 4                | 3       | 2        | 0             | 1            | 0     | 0      |
| 1     | 4           | N                      | 4                | 3       | 2        | 1             | 3            | 0     | 0      |
| 1     | 0           | N                      | 0                | 3       | 3        | 2             | 0            | 0     | 0      |
| 1     | 1           | N                      | 1                | 1       | 3        | 1             | 1            | 0     | 0      |
| 1     | 4           | N                      | 0                | 2       | 2        | 2             | 1            | 0     | 1      |
| 1     | 4           | Y                      | 2                | 2       | 2        | 0             | 1            | 1     | 0      |
| 1     | 1           | N                      | 0                | 2       | 2        | 2             | 0            | 1     | 0      |
| 1     | 4           | Y                      | 3                | 3       | 3        | 2             | 2            | 3     | 0      |
| 1     | 4           | Y                      | 3                | 3       | 0        | 0             | 0            | 0     | 3      |
| 2     | 4           | Y                      | 4                | 3       | 2        | 2             | 0            | 0     | 0      |
| 2     | 4           | Y                      | 4                | 3       | 2        | 1             | 0            | 0     | 0      |
| 2     | 4           | N                      | 3                | 3       | 2        | 1             | 2            | 0     | 1      |
| 2     | 4           | N                      | 2                | 2       | 2        | 2             | 1            | 0     | 2      |
| 2     | 4           | Y                      | 1                | 2       | 0        | 0             | 0            | 0     | 0      |
| 2     | 4           | Y                      | 1                | 0       | 2        | 2             | 0            | 0     | 0      |

The table displays data on Grade 3-4 toxicities that required a dose reduction.

Level 1 corresponds to a 75% dose reduction while Level 2 corresponds to a dose reduction. Y = toxicity present N= toxicity not present
